# Supplementary material
Source: PubMed Central journal article supplement (PMC7001461)
Supplement: Supp_Table2.pdf [file Supp_Table2.pdf]

## Supplementary Data

SUPPLEMENTARY TABLE S2. ABBREVIATED INDICATIONS WITH PPR CALCULATED  
FOR NEW DRUGS APPROVED BY FDA CDER (2013–2015)

| <i>Abbreviated indication</i>                     | <i>Established name (proprietary name)</i>                                   |
|---------------------------------------------------|------------------------------------------------------------------------------|
| 1. Acquired generalized lipodystrophy             | Metreleptin (Myalept)                                                        |
| 2. Acute lymphoblastic leukemia                   | Blinatumomab (Blincyto)                                                      |
| 3. Acute otitis externa                           | Finafloxacin (Xtoro)                                                         |
| 4. Asthma                                         | Mepolizumab (Nucala)                                                         |
| 5. Atrial fibrillation                            | Edoxaban (Savaysa)                                                           |
| 6. Basal cell carcinoma                           | Sonidegib (Odomzo)                                                           |
| 7. Bipolar 1 disorder                             | Cariprazine (Vraylar)                                                        |
| 8. Breast cancer                                  | Ado-trastuzumab emtansine (Kadcyla)                                          |
| 9. Chemotherapy-induced nausea and vomiting       | Netupitant and palonosetron (Akynzeo)                                        |
| Chemotherapy-induced nausea and vomiting          | Rolapitant (Varubi)                                                          |
| 10. Chronic lymphocytic leukemia                  | Idelalisib (Zydelig)                                                         |
| Chronic lymphocytic leukemia                      | Obinutuzumab (Gazyva)                                                        |
| 11. Chronic obstructive pulmonary disease         | Fluticasone furoate and vilanterol trifenate (Breo Ellipta)                  |
| Chronic obstructive pulmonary disease             | Olodaterol (Striverdi Respimat)                                              |
| Chronic obstructive pulmonary disease             | Umeclidinium bromide and vilanterol trifenate (Anoro Ellipta)                |
| 12. Chronic thromboembolic pulmonary hypertension | Riociguat (Adempas)                                                          |
| 13. Colorectal cancer                             | Trifluridine and tipiraci (Lonsurf)                                          |
| 14. Crohn's disease                               | Vedolizumab (Entyvio)                                                        |
| 15. Cystic fibrosis                               | Lumacaftor/ivacaftor (Orkambi)                                               |
| 16. Diabetes mellitus                             | Albiglutide (Tanzeum)                                                        |
| Diabetes mellitus                                 | Alogliptin (Nesina)                                                          |
| Diabetes mellitus                                 | Alogliptin/metformin (Kazano)                                                |
| Diabetes mellitus                                 | Alogliptin/pioglitazone (Oseni)                                              |
| Diabetes mellitus                                 | Canagliflozin (Invokana)                                                     |
| Diabetes mellitus                                 | Dapagliflozin (Farxiga)                                                      |
| Diabetes mellitus                                 | Dulaglutide (Trulicity)                                                      |
| Diabetes mellitus                                 | Empagliflozin (Jardiance)                                                    |
| Diabetes mellitus                                 | Insulin degludec (Tresiba)                                                   |
| Diabetes mellitus                                 | Insulin degludec/insulin aspart (Ryzodeg)                                    |
| 17. Follicular B cell non-Hodgkin lymphoma        | Idelalisib (Zydelig)                                                         |
| 18. Gastric cancer                                | Ramucirumab (Cyramza)                                                        |
| 19. Gastroesophageal junction adenocarcinoma      | Ramucirumab (Cyramza)                                                        |
| 20. Gaucher disease type 1                        | Eliglustat (Cerdelga)                                                        |
| 21. Gout                                          | Lesinurad (Zurampic)                                                         |
| 22. Heart failure                                 | Ivabradine (Corlanor)                                                        |
| Heart failure                                     | Sacubitril and valsartan (Entresto)                                          |
| 23. Hepatitis C virus, chronic                    | Daclatasvir (Daklinza)                                                       |
| Hepatitis C virus, chronic                        | Ledipasvir and sofosbuvir (Harvoni)                                          |
| Hepatitis C virus, chronic                        | Ombitasvir, paritaprevir, ritonavir, and dasabuvir (Viekira Pak)             |
| Hepatitis C virus, chronic                        | Simeprevir (Olysio)                                                          |
| Hepatitis C virus, chronic                        | Sofosbuvir (Sovaldi)                                                         |
| 24. Human immunodeficiency virus                  | Dolutegravir (Tivicay)                                                       |
| Human immunodeficiency virus                      | Elvitegravir, cobicistat, emtricitabine, and tenofovir alafenamide (Genvoya) |
| 25. Idiopathic pulmonary fibrosis                 | Nintedanib (Ofev)                                                            |
| Idiopathic pulmonary fibrosis                     | Pirfenidone (Esbriet)                                                        |
| 26. Influenza                                     | Peramivir (Rapivab)                                                          |
| 27. Insomnia                                      | Suvorexant (Belsomra)                                                        |
| 28. Intra-abdominal infections, complicated       | Ceftazidime-avibactam (Avycaz)                                               |
| Intra-abdominal infections, complicated           | Ceftolozane/tazobactam (Zerbaxa)                                             |
| 29. Invasive aspergillosis                        | Isavuconazonium sulfate (Cresemba)                                           |
| 30. Irritable bowel syndrome with diarrhea        | Eluxadoline (Viberzi)                                                        |

*(continued)*

SUPPLEMENTARY TABLE S2. (CONTINUED)

| <i>Abbreviated indication</i>                           | <i>Established name (proprietary name)</i> |
|---------------------------------------------------------|--------------------------------------------|
| 31. Leiomyosarcoma                                      | Trabectedin (Yondelis)                     |
| 32. Liposarcoma                                         | Trabectedin (Yondelis)                     |
| 33. Major depressive disorder                           | Brexpiprazole (Rexulti)                    |
| Major depressive disorder                               | Vortioxetine (Brintellix)                  |
| 34. Mantle cell lymphoma                                | Ibrutinib (Imbruvica)                      |
| 35. Melanoma                                            | Nivolumab (Opdivo)                         |
| Melanoma                                                | Pembrolizumab (Keytruda)                   |
| 36. Melanoma– <i>BRAF V600E</i>                         | Cobimetinib (Cotellic)                     |
| Melanoma– <i>BRAF V600E</i>                             | Dabrafenib (Tafinlar)                      |
| Melanoma– <i>BRAF V600E</i>                             | Trametinib (Mekinist)                      |
| 37. Melanoma– <i>BRAF V600K</i>                         | Cobimetinib (Cotellic)                     |
| Melanoma– <i>BRAF V600K</i>                             | Trametinib (Mekinist)                      |
| 38. Mucopolysaccharidosis type IVA (Morquio A syndrome) | Elosulfase alfa (Vimizim)                  |
| 39. Multicentric Castleman's disease                    | Siltuximab (Sylvant)                       |
| 40. Multiple myeloma                                    | Daratumumab (Darzalex)                     |
| Multiple myeloma                                        | Elotuzumab (Empliciti)                     |
| Multiple myeloma                                        | Ixazomib (Ninlaro)                         |
| Multiple myeloma                                        | Panobinostat (Farydak)                     |
| Multiple myeloma                                        | Pomalidomide (Pomalyst)                    |
| 41. Multiple sclerosis                                  | Dimethyl fumarate (Tecfidera)              |
| Multiple sclerosis                                      | Peginterferon beta-1a (Plegridy)           |
| 42. Noncancer pain, chronic                             | Naloxegol (Movantik)                       |
| 43. Nonsmall cell lung cancer                           | Afatinib (Gilotrif)                        |
| Nonsmall cell lung cancer                               | Necitumumab (Portrazza)                    |
| 44. NSCLC– <i>ALK+</i>                                  | Alectinib (Alecensa)                       |
| NSCLC– <i>ALK+</i>                                      | Ceritinib (Zykadia)                        |
| 45. NSCLC– <i>EGFR T790M</i>                            | Osimertinib (Tagrisso)                     |
| 46. Onychomycosis                                       | Efinaconazole (Jublia)                     |
| Onychomycosis                                           | Tavaborole (Kerydin)                       |
| 47. Percutaneous coronary intervention                  | Cangrelor (Kengreal)                       |
| 48. Peripheral T cell lymphoma                          | Belinostat (Beleodaq)                      |
| 49. Plaque psoriasis                                    | Secukinumab (Cosentyx)                     |
| 50. Psoriatic arthritis, active                         | Apremilast (Otezla)                        |
| 51. Pulmonary arterial hypertension                     | Macitentan (Opsumit)                       |
| Pulmonary arterial hypertension                         | Riociguat (Adempas)                        |
| Pulmonary arterial hypertension                         | Selexipag (Upravi)                         |
| 52. Schizophrenia                                       | Aripiprazole lauroxil (Aristada)           |
| Schizophrenia                                           | Brexpiprazole (Rexulti)                    |
| Schizophrenia                                           | Cariprazine (Vraylar)                      |
| 53. Small lymphocytic lymphoma                          | Idelalisib (Zydelig)                       |
| 54. Submental fat                                       | Deoxycholic acid (Kybella)                 |
| 55. Thyroid cancer                                      | Lenvatinib (Lenvima)                       |
| 56. Tinea corporis                                      | Luliconazole (Luzu)                        |
| 57. Tinea cruris                                        | Luliconazole (Luzu)                        |
| 58. Tinea pedis                                         | Luliconazole (Luzu)                        |
| 59. Ulcerative colitis                                  | Vedolizumab (Entyvio)                      |
| 60. Venous thromboembolism                              | Edoxaban (Savaysa)                         |

*ALK+*, anaplastic lymphoma kinase-positive; CDER, Center for Drug Evaluation and Research; *EGFR*, epidermal growth factor receptor; FDA, Food and Drug Administration; NSCLC, nonsmall cell lung cancer.
